# Supplementary material
Source: publisher site journal article supplement (https://www.spandidos-publications.com/5790/downloadSupplementary)

Figure S1. Flow diagram of the research studies included in the meta-analysis.

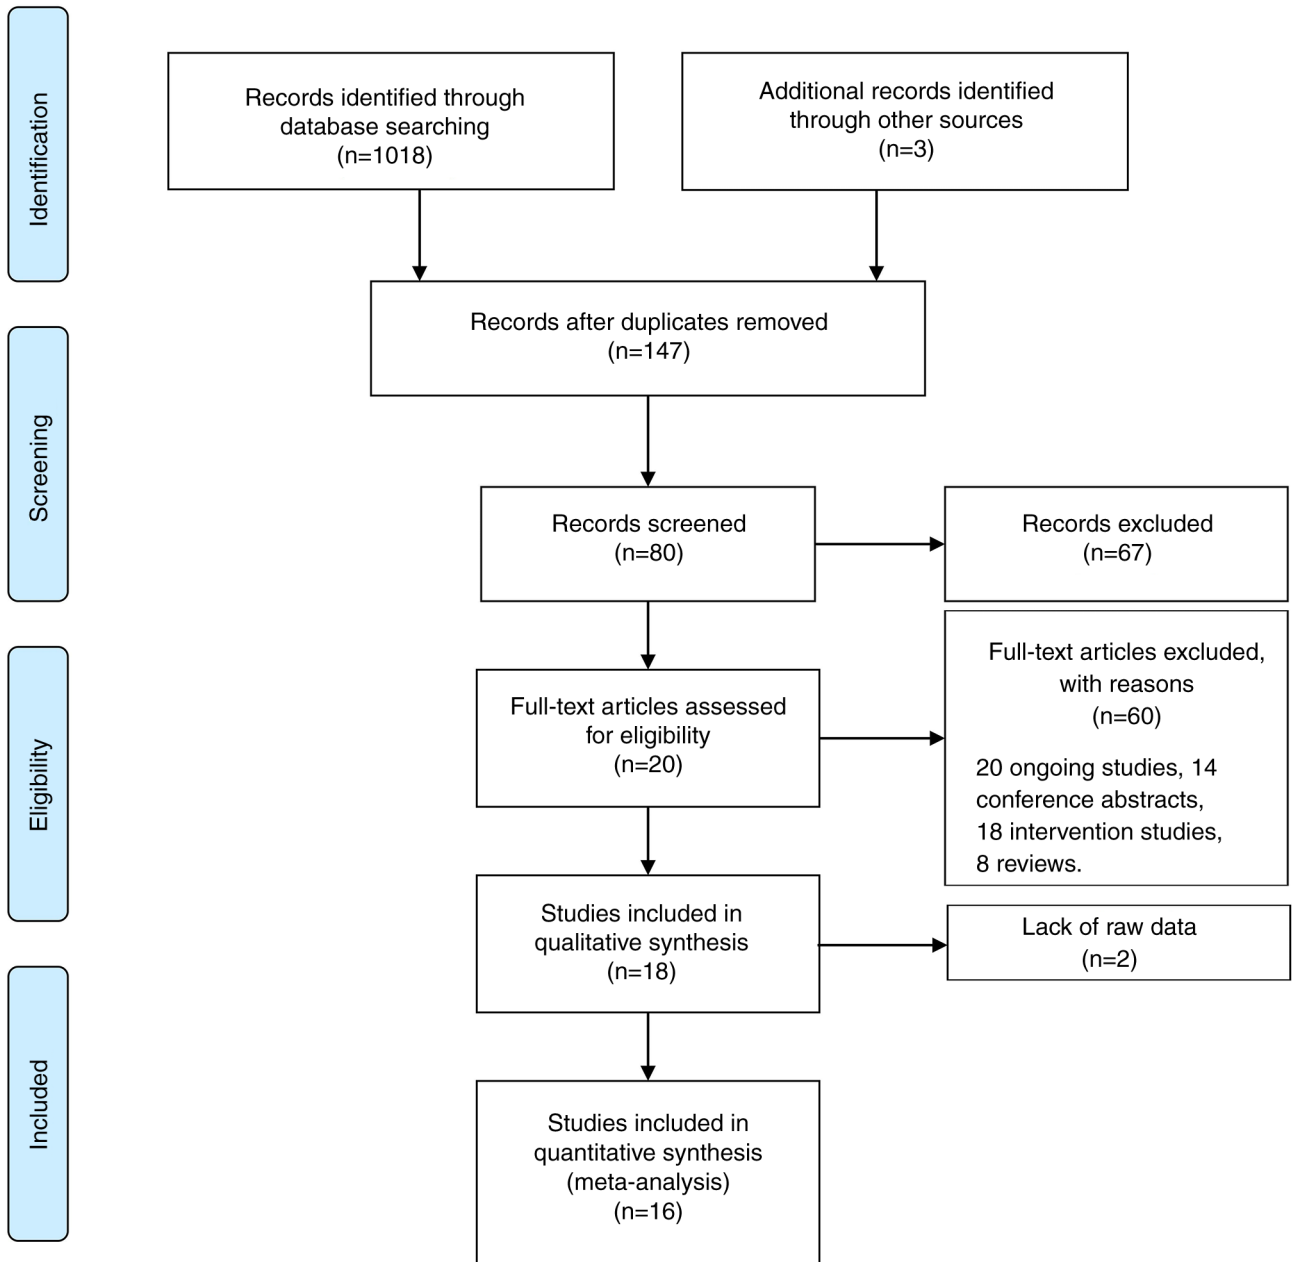

Figure S2. Quality assessment. (A) Heart rate variation. (B) Bronchospasm. (C) Throat pain. (D) Mucosal injury. (E) Hypoxemia. (F) Postoperative cough. (G) Nausea and vomiting. (H) Reflux aspiration. (I) One-time implantation success rate. According to the qualitative analysis of the funnel plot, the distribution of the included literature was symmetrical, and the publication bias was small. MD, mean difference; SE, standard error; OR, odds ratio; SE (log [OR]), SE of the natural logarithm of the OR.

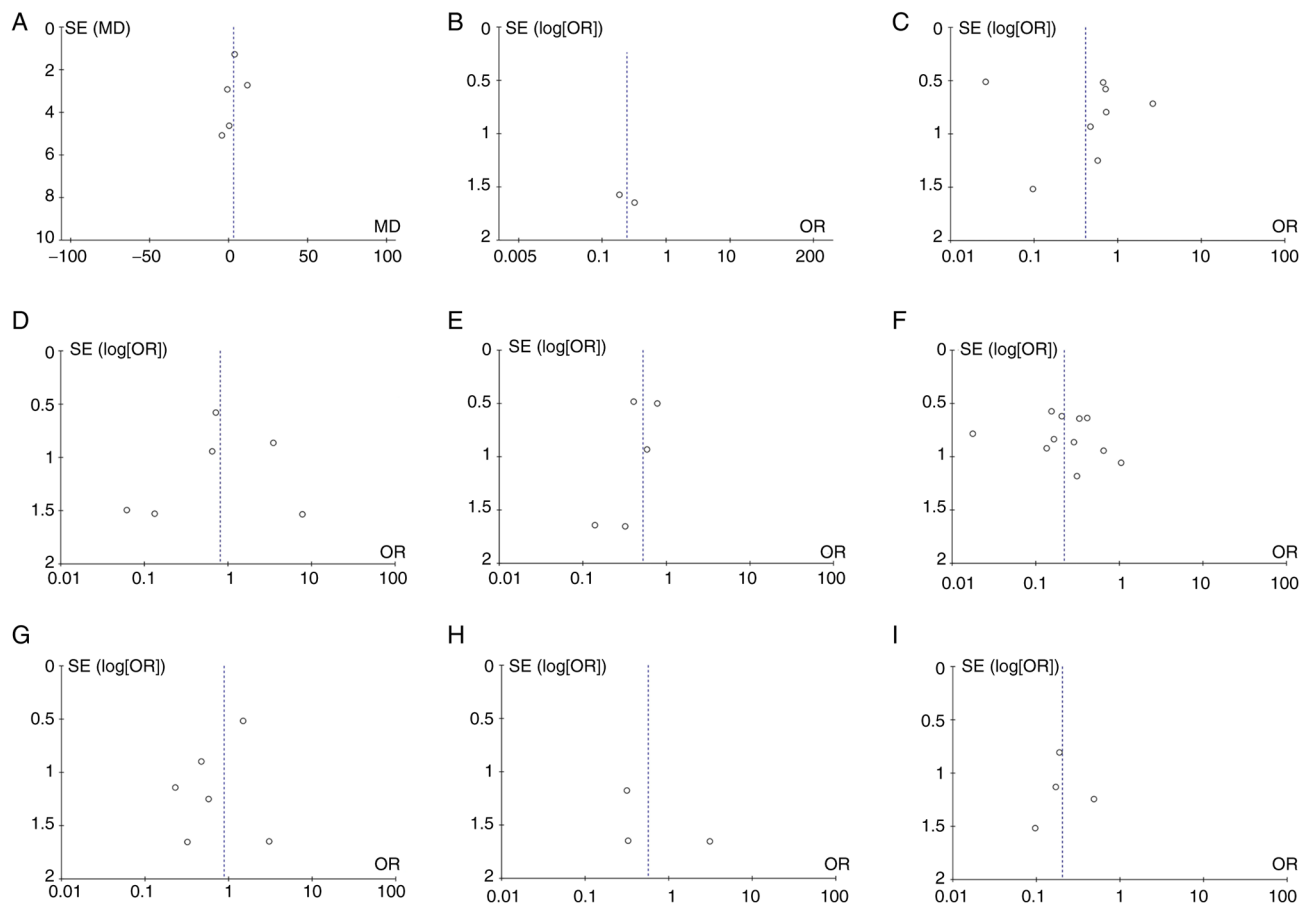

Figure S3. Risk of bias graph. Percentages across all included studies.

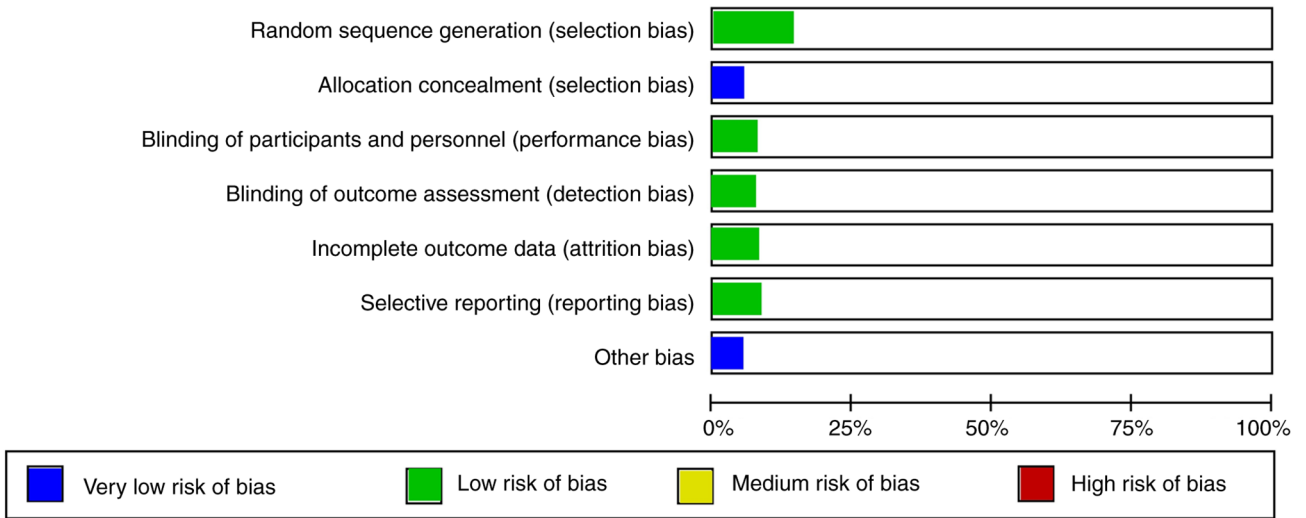

Supplement: Supplementary file 1 [file downloadSupplementary]
